# Supplementary material for: Correlation between fruit weight and nutritional metabolism during development in CPPU-treated Actinidia chinensis ‘Hongyang’
Source: PeerJ. 2020 Aug 14;8:e9724. doi: 10.7717/peerj.9724 (PMC7430263; doi:10.7717/peerj.9724)
Supplement: Supplemental Information 1 — The HY represents untreated fruit, the HYP represents CPPU-treated fruit. [file peerj-08-9724-s001.xlsx]

## Sheet: Sheet1
DAA25
	HY-1	13.576		HYP-1	13.576
	HY-2	11.551		HYP-2	11.551
	HY-3	14.39		HYP-3	14.39
	standard deviation	1.46191			1.46191
	average value	13.17			13.17
DAA40
	HY-1	16.679		HYP-1	26.114
	HY-2	18.715		HYP-2	24.55
	HY-3	23.728		HYP-3	26.866
	standard deviation	3.62776			1.18149
	average value	19.7			25.84
DAA55	HY-1	37.589		HYP-1	41.848
	HY-2	33.415		HYP-2	40.57
	HY-3	27.749		HYP-3	41.4853
	standard deviation	4.93882			0.658615
	average value	32.92			41.3011
DAA70	HY-1	42.142		HYP-1	46.8677
	HY-2	44.909		HYP-2	52.47
	HY-3	42.1843		HYP-3	53.216
	standard deviation	1.58545			3.46997
	average value	43.07			50.85
DAA85	HY-1	52.7297		HYP-1	59.147
	HY-2	51.479		HYP-2	59.374
	HY-3	48.753		HYP-3	57.2797
	standard deviation	2.03343			1.14925
	average value	51			58.6
DAA100	HY-1	59.374		HYP-1	66.188
	HY-2	61.825		HYP-2	67.314
	HY-3	56.501		HYP-3	68.965
	standard deviation	2.66479			1.39675
	average value	59.2			67.49
DAA115	HY-1	63.445		HYP-1	71.63
	HY-2	59.187		HYP-2	68.822
	HY-3	62.646		HYP-3	77.927
	standard deviation	2.26324			4.66258
	average value	61.76			72.79
DAA130	HY-1	62.81		HYP-1	72.57
	HY-2	67.223		HYP-2	71.0697
	HY-3	63.89		HYP-3	77.5887
	standard deviation	2.30036			3.41407
	average value	64.64			73.74
