# Supplementary material for: Correlation between fruit weight and nutritional metabolism during development in CPPU-treated Actinidia chinensis ‘Hongyang’
Source: PeerJ. 2020 Aug 14;8:e9724. doi: 10.7717/peerj.9724 (PMC7430263; doi:10.7717/peerj.9724)
Supplement: Supplemental Information 5 — The HY represents untreated fruit, the HYP represents CPPU-treated fruit. [file peerj-08-9724-s005.xlsx]

## Sheet: Sheet1
soluble sugars	(%)
DAA25
HY-1	0.55		HYP-1	0.55
HY-2	0.45		HYP-2	0.45
HY-3	0.36		HYP-3	0.36
average value	0.453333		average value	0.453333
SD	0.0950438		SD	0.0950438
DAA40
HY-1	0.58		HYP-1	0.6
HY-2	0.4		HYP-2	0.77
HY-3	0.46		HYP-3	0.52
average value	0.48		average value	0.63
SD	0.0916515		SD	0.127671
DAA55
HY-1	0.55		HYP-1	0.79
HY-2	0.41		HYP-2	0.85
HY-3	0.59		HYP-3	0.68
average value	0.516667		average value	0.773333
SD	0.0945163		SD	0.0862168
DAA70
HY-1	0.57		HYP-1	0.87
HY-2	0.55		HYP-2	0.78
HY-3	0.49		HYP-3	0.68
average value	0.536667		average value	0.776667
SD	0.0416333		SD	0.0950438
DAA85
HY-1	0.67		HYP-1	0.71
HY-2	0.52		HYP-2	0.883
HY-3	0.5		HYP-3	0.78
average value	0.563333		average value	0.791
SD	0.0929157		SD	0.087023
DAA100
HY-1	0.51		HYP-1	0.93
HY-2	0.62		HYP-2	1.1
HY-3	0.7		HYP-3	0.85
average value	0.61		average value	0.96
SD	0.0953939		SD	0.127671
HY-1	2.53		HYP-1	2.99
HY-2	2.9		HYP-2	2.87
HY-3	2.13		HYP-3	2.96
average value	2.52		average value	2.94
SD	0.385097		SD	0.06245
HY-1	4.5		HYP-1	5.42
HY-2	4.54		HYP-2	4.87
HY-3	4.7		HYP-3	5.3
average value	4.58		average value	5.19667
SD	0.10583		SD	0.289194
