# Supplementary material for: Correlation between fruit weight and nutritional metabolism during development in CPPU-treated Actinidia chinensis ‘Hongyang’
Source: PeerJ. 2020 Aug 14;8:e9724. doi: 10.7717/peerj.9724 (PMC7430263; doi:10.7717/peerj.9724)
Supplement: Supplemental Information 8 — The HY represents untreated fruit, the HYP represents CPPU-treated fruit. [file peerj-08-9724-s008.xlsx]

## Sheet: Sheet1
DAA25
HY-1	15.1		HYP-1	15.1
HY-2	15.1		HYP-2	15.1
HY-3	12.1		HYP-3	12.1
average value	14.1		average value	14.1
SD	1.73205		SD	1.73205
DAA40
HY-1	17.3		HYP-1	14.28
HY-2	14.6		HYP-2	16.21
HY-3	17		HYP-3	15.98
average value	16.3		average value	15.49
SD	1.47986		SD	1.05418
DAA55
HY-1	27.4		HYP-1	33.52
HY-2	31.8		HYP-2	34.59
HY-3	30.1		HYP-3	35.96
average value	29.8mg/g		average value	34.69
SD	2.21886		SD	1.22307
DAA70
HY-1	49		HYP-1	52.24
HY-2	59.6		HYP-2	48.51
HY-3	49.8		HYP-3	51.5
average value	52.8		average value	50.75
SD	5.90254		SD	1.97487
DAA85
HY-1	73.8		HYP-1	73.464
HY-2	78.6		HYP-2	75.02
HY-3	69.2		HYP-3	74.5
average value	73.9		average value	74.328
SD	4.70035		SD	0.792131
DAA100
HY-1	120.44		HYP-1	130.42
HY-2	118.6		HYP-2	131.05
HY-3	134.73		HYP-3	121.66
average value	124.59		average value	127.71
SD	8.82956		SD	5.24891
DAA115
HY-1	123.75		HYP-1	132.15
HY-2	116.84		HYP-2	130.64
HY-3	130.78		HYP-3	124.18
average value	123.79		average value	128.88
SD	6.97009		SD	4.23345
DAA130
HY-1	118.8		HYP-1	128.757
HY-2	126.88		HYP-2	132.88
HY-3	130.55		HYP-3	130.55
average value	125.41		average value	130.73
SD	6.01135		SD	2.06732
