# Supplementary material for: Correlation between fruit weight and nutritional metabolism during development in CPPU-treated Actinidia chinensis ‘Hongyang’
Source: PeerJ. 2020 Aug 14;8:e9724. doi: 10.7717/peerj.9724 (PMC7430263; doi:10.7717/peerj.9724)
Supplement: Supplemental Information 9 — The HY represents untreated fruit, the HYP represents CPPU-treated fruit. [file peerj-08-9724-s009.xlsx]

## Sheet: Sheet1
DAA25
HY-1	36.4		HYP-1	36.4
HY-2	30.1		HYP-2	30.1
HY-3	32.2		HYP-3	32.2
average value	32.9		average value	32.9
SD	3.2078		SD	3.2078
DAA40
HY-1	57.05		HYP-1	49
HY-2	47.95		HYP-2	40.95
HY-3	52.15		HYP-3	44.1
average value	52.38		average value	44.68
SD	4.55448		SD	4.05658
DAA55
HY-1	0.282		HYP-1	82.6
HY-2	0.262		HYP-2	86.8
HY-3	0.276		HYP-3	98
average value	95.67		average value	89.1
SD	3.59212		SD	7.96074
DAA70
HY-1	155.75		HYP-1	157.15
HY-2	163.7		HYP-2	158.9
HY-3	159.95		HYP-3	156.45
average value	159.8		average value	157.5
SD	3.97712		SD	1.26194
DAA85
HY-1	158.2		HYP-1	154.7
HY-2	152.95		HYP-2	156.8
HY-3	161.35		HYP-3	157.15
average value	157.5		average value	156.22
SD	4.24352		SD	1.32508
DAA100
HY-1	184.45		HYP-1	182.35
HY-2	175.7		HYP-2	186.2
HY-3	186.2		HYP-3	181.3
average value	182.12		average value	183.28
SD	5.62546		SD	2.57989
DAA115
HY-1	189.7		HYP-1	187.6
HY-2	179.55		HYP-2	180.25
HY-3	184.59		HYP-3	182.35
average value	157.5		average value	183.4
SD	4.24352		SD	3.78583
HY-1	192.85		HYP-1	187.95
HY-2	189.7		HYP-2	191.8
HY-3	182.35		HYP-3	191.1
average value	188.3		average value	190.28
SD	5.38818		SD	2.05081
