# Supplementary material for: Correlation between fruit weight and nutritional metabolism during development in CPPU-treated Actinidia chinensis ‘Hongyang’
Source: PeerJ. 2020 Aug 14;8:e9724. doi: 10.7717/peerj.9724 (PMC7430263; doi:10.7717/peerj.9724)
Supplement: Supplemental Information 10 — The HY represents untreated fruit, the HYP represents CPPU-treated fruit. [file peerj-08-9724-s010.xlsx]

## Sheet: Sheet1
DAA25
		fructose			glucose			sucrose
HY-1	211531	12.64		95812	3.882		117946	6.744
HY-2	242323	14.48		117581	4.764		133459	7.631
HY-3	287843	17.2		152332	6.17199		159290	9.10801
	average value	14.7733		average value	4.93933		average value	7.82767
	SD	2.29411		SD	1.15502		SD	1.19421
HYP-1	211531	12.64		95812	3.882		117946	6.744
HYP-2	242323	14.48		117581	4.764		133459	7.631
HYP-3	287843	17.2		152332	6.17199		159290	9.10801
	average value	14.7733		average value	4.93933		average value	7.82767
	SD	2.29411		SD	1.15502		SD	1.19421
DAA40
HY-1	401641	24		335665	13.6		321800	18.4
HY-2	401641	24		236940	9.6		293818	16.8
HY-3	535521	32		335665	13.6		279826	16
	average value	26.6667		average value	12.2667		average value	17.0667
	SD	4.6188		SD	2.3094		SD	1.22202
HYP1 5.25	401641	24		789801	32		279826	16
HYP2 5.25	348089	20.8		789801	32		419739	24
HYP3 5.25	348089	20.8		592351	24		419739	24
	average value	21.8667		average value	29.3333		average value	21.3333
	SD	1.84752		SD	4.6188		SD	4.6188
DAA55
HY1 6.9	1504716	89.914		1442923	58.4622		859900	49.1677
HY2 6.9	1228986	73.4378		1099250	44.5378		725400	41.4772
HY3 6.9	1009384	60.3155		1494166	60.5384		1045318	59.7695
	average value	74.5558		average value	54.5128		average value	50.1381
	SD	14.8309		SD	8.70077		SD	9.18472
HYP1 6.9	2246295	134.227		2246295	91.0121		1270696	72.6563
HYP2 6.9	2286023	136.601		2363992	95.7808		1238665	70.8248
HYP4 6.9	2207908	131.933		2192290	88.824		1218795	69.6036
	average value	134.254		average value	91.8723		average value	71.0282
	SD	2.33399		SD	3.55726		SD	1.53649
DAA70
HY1 6.24	1645813	98.3452		1372003	55.5888		1788805	102.281
HY2 6.24	1697962	109.681		1390136	59.846		1858594	106.271
HY3 6.24	2300273	137.452		1864062	75.5253		1742704	99.6449
	average value	115.159		average value	63.6534		average value	102.732
	SD	20.121		SD	10.4994		SD	3.33619
HYP1 6.24	5993056	358.114		3074683	124.576		1238433	70.8115
HYP2 6.24	4564600	272.757		2527316	102.398		1351735	77.29
HYP3 6.24	4151718	248.085		1812336	73.4296		1325311	75.7791
	average value	292.985		average value	110.801		average value	74.6269
	SD	57.7363		SD	12.4275		SD	3.38942
DAA85
7.9HY1	3030639	181.095		2289182	172.75		722348	121.303
7.9HY2	3801631	226.185		5718020	231.674		2148011	122.82
7.9HY3	4130718	246.83		6109569	247.539		2120037	121.22
	average value	218.037		average value	217.321		average value	121.781
	SD	33.6165		SD	39.4063		SD	0.900615
7.9HYP1	10156629	606.907		8497255	344.279		2040681	106.683
7.9HYP2	11411138	681.87		8598987	348.401		1502847	85.9303
7.9HYP3	11143683	665.888		9274313	375.763		1647829	79.2201
	average value	651.555		average value	356.148		average value	90.6111
	SD	39.4834		SD	17.1118		SD	14.3172
DAA100
7.24HY1	6764621	404.219		6978043	282.726		2220980	126.992
7.24HY2	8509872	508.506		7498674	303.82		2667343	152.514
7.24HY3	6752476	403.493		7982298	323.415		2463638	140.867
	average value	438.739		average value	303.321		average value	140.124
	SD	60.4208		SD	20.3491		SD	12.7773
7.24HYP1	11251185	672.312		8355773	338.547		1491491	85.281
7.24HYP2	11852618	708.251		9514148	385.48		1697601	97.066
7.24HYP3	11932787	713.041		9523730	385.869		1373595	78.5399
	average value	697.868		average value	369.965		average value	86.9623
	SD	22.2612		SD	27.2097		SD	9.3768
DAA115
8.9HY-1	489686	1108.09		148263	872.787		54539	147.675
8.9HY-2	455136	1029.91		121920	717.713		58595	146.426
8.9HY-3	406960	920.891		147197	866.512		65345	150.99
	average value	1019.63		average value	819.004		average value	148.364
	SD	94.0207		SD	87.777		SD	2.35868
8.9HYP-1	493562	1346.86		260877	1855.72		56807	122.568
8.9HYP-2	456775	1293.61		352881	1997.32		52532	113.344
8.9HYP-3	479820	1185.76		388574	1807.44		68239	147.234
	average value	1275.41		average value	1886.83		average value	121.049
	SD	82.0762		SD	98.6904		SD	7.06845
DAA130
8.24HY-1	424718	961.074		196969	1159.51		89060	192.158
8.24HY-2	473469	1071.39		253366	1491.5		86992	187.696
8.24HY-3	466701	1056.08		212550	1251.23		95179	205.361
	average value	1029.51		average value	1300.75		average value	195.072
	SD	59.7627		SD	171.447		SD	9.18558
8.24HYP-1	817418	1849.7		280761	2046.72		72420	156.255
8.24HYP-2	902910	2043.15		350400	1800.07		70336	151.759
8.24HYP-3	670318	1516.83		211069	1737.6		64625	139.437
	average value	1803.23		average value	1861.46		average value	149.15
	SD	266.22		SD	163.453		SD	8.7075
