# Supplementary material for: Correlation between fruit weight and nutritional metabolism during development in CPPU-treated Actinidia chinensis ‘Hongyang’
Source: PeerJ. 2020 Aug 14;8:e9724. doi: 10.7717/peerj.9724 (PMC7430263; doi:10.7717/peerj.9724)
Supplement: Supplemental Information 11 — The HY represents untreated fruit, the HYP represents CPPU-treated fruit. [file peerj-08-9724-s011.xlsx]

## Sheet: Sheet1
		quinic acid				malic acid				citric acid
DAA25
	HY-1	1.21428			HY-1	0.0978486			HY-1	0.0400475
	HY-2	1.21428			HY-2	0.0978486			HY-2	0.0400475
	HY-3	1.40727			HY-3	0.119098			HY-3	0.0402235
	average value	1.27861			average value	0.104932			average value	0.0401062
	SD	0.111419			SD	0.0122685			SD	0.000101585
DAA40	HY-1	1.21404		5.25	HY-1	0.244974		5.25	HY-1	0.109921
	HY-2	1.2742			HY-2	0.20928			HY-2	0.0973949
	HY-3	1.25327			HY-3	0.198534			HY-3	0.10617
	average value	1.24717			average value	0.217596			average value	0.104495
	SD	0.0305395			SD	0.0243108			SD	0.00642877
DAA55	HY-1	1.29449		6.9	HY-1	0.3334		6.9	HY-1	0.0851007
	HY-2	1.27119			HY-2	0.320311			HY-2	0.0827518
	HY-3	1.11765			HY-3	0.349478			HY-3	0.106644
	average value	1.22778			average value	0.334396			average value	0.091499
	SD	0.096085			SD	0.0146092			SD	0.0131689
DAA70	HY-1	1.03484		6.24	HY-1	0.235322		6.24	HY-1	0.253648
	HY-2	1.16834			HY-2	0.241828			HY-2	0.293603
	HY-3	1.11255			HY-3	0.208041			HY-3	0.278035
	average value	1.10524			average value	0.228397			average value	0.275095
	SD	0.067052			SD	0.0179266			SD	0.0201393
DAA85	HY-1	0.915616		7.9	HY-1	0.172305		7.9	HY-1	0.25552
	HY-2	0.96664			HY-2	0.202009			HY-2	0.291061
	HY-3	0.93538			HY-3	0.183059			HY-3	0.338653
	average value	0.939212			average value	0.185791			average value	0.295078
	SD	0.0257266			SD	0.0150389			SD	0.041712
DAA100	HY-1	1.04804		7.24	HY-1	0.172591		7.24	HY-1	0.476623
	HY-2	0.954446			HY-2	0.168015			HY-2	0.406405
	average value	1.00124			average value	0.170303			average value	0.441514
	SD	0.0661787			SD	0.00228794			SD	0.0351091
DAA115	HY-1	0.857248		8.9	HY-1	0.150953		8.9	HY-1	0.473005
	HY-2	0.876554			HY-2	0.166644			HY-2	0.487365
	HY-3	0.764127			HY-3	0.168413			HY-3	0.456645
	average value	0.832643			average value	0.162003			average value	0.472338
	SD	0.0601165			SD	0.00961049			SD	0.0153707
DAA130	HY-1	0.744366		8.24	HY-1	0.15464		8.24	HY-1	0.665685
	HY-2	0.828431			HY-2	0.156838			HY-2	0.605543
	HY-3	0.800927			HY-3	0.138613			HY-3	0.66261
	average value	0.791241			average value	0.150031			average value	0.644613
	SD	0.0428614			SD	0.00994837			SD	0.0338702
		quinic acid				malic acid				citric acid
DAA25
	HY-1	1.21428			HY-1	0.0978486			HY-1	0.0400475
	HY-2	1.21428			HY-2	0.0978486			HY-2	0.0400475
	HY-3	1.40727			HY-3	0.119098			HY-3	0.0402235
	average value	1.27861			average value	0.104932			average value	0.0401062
	SD	0.111419			SD	0.0122685			SD	0.000101585
DAA40	HYP-1	1.2742		5.25	HYP-1	0.20928		5.25	HYP-1	0.0973949
	HYP-2	1.28747			HYP-2	0.211371			HYP-2	0.109921
	HYP-3	1.2682			HYP-3	0.225664			HYP-3	0.0936273
	average value	1.27662			average value	0.215439			average value	0.100314
	SD	0.00986042			SD	0.00891707			SD	0.00853015
DAA55	HYP-1	1.45518		6.9	HYP-1	0.418172		6.9	HYP-1	0.0921639
	HYP-2	1.57156			HYP-2	0.491324			HYP-2	0.104796
	HYP-3	1.41002			HYP-3	0.373961			HYP-3	0.0909299
	average value	1.47892			average value	0.427819			average value	0.0959634
	SD	0.0833478			SD	0.0592735			SD	0.00767437
DAA70	HYP-1	0.863368		6.24	HYP-1	0.191969		6.24	HYP-1	0.289046
	HYP-2	0.905917			HYP-2	0.193387			HYP-2	0.289165
	HYP-3	0.865036			HYP-3	0.190065			HYP-3	0.292084
	average value	0.878107			average value	0.191807			average value	0.290098
	SD	0.0240982			SD	0.00166728			SD	0.00172061
DAA85	HYP-1	1.2202		7.9	HYP-1	0.178055		7.9	HYP-1	0.288371
	HYP-2	1.21862			HYP-2	0.173328			HYP-2	0.404926
	HYP-3	1.3024			HYP-3	0.182054			HYP-3	0.38648
	average value	1.24707			average value	0.177812			average value	0.359926
	SD	0.0479184			SD	0.00436793			SD	0.0626505
DAA100	HYP-1	0.6861		7.24	HYP-1	0.141826		7.24	HYP-1	0.430223
	HYP-2	0.822122			HYP-2	0.165179			HYP-2	0.35841
	HYP-3	0.709797			HYP-3	0.15845			HYP-3	0.48622
	average value	0.73934			average value	0.155152			average value	0.424951
	SD	0.0593302			SD	0.012021			SD	0.0640683
DAA115	HYP-1	0.571658		8.9	HYP-1	0.148213		8.9	HYP-1	0.462518
	HYP-2	0.601517			HYP-2	0.143276			HYP-2	0.425114
	HYP-3	0.686043			HYP-3	0.154042			HYP-3	0.474437
	average value	0.619739			average value	0.14851			average value	0.454023
	SD	0.0593299			SD	0.00538919			SD	0.0257352
DAA130	HYP-1	0.614515		8.24	HYP-1	0.138613		8.24	HYP-1	0.568058
	HYP-2	0.646116			HYP-2	0.146061			HYP-2	0.467339
	HYP-3	0.651317			HYP-3	0.136412			HYP-3	0.549806
	average value	0.637316			average value	0.140362			average value	0.528401
	SD	0.0199169			SD	0.00505649			SD	0.0536632
